# Supplementary material for: Computational Identification of Novel Inhibitors Targeting Multiple Proteins of Tomato Brown Rugose Fruit Virus (ToBRFV) Through AlphaFold-Based Protein Modeling, Molecular Docking, MM/GBSA Binding Free Energy Analysis, and Molecular Dynamics Simulation
Source: Research Square preprint supplement (doi:10.21203/rs.3.rs-8550076/v1), 2026-02-12
Supplement: Supplementary file 1 [file da54055a8b62d741a11922d6.docx]

**Table S1.** List of the top ten phytochemicals exhibiting the highest molecular docking scores for each ToBRFV viral target.

| **S.No** | **Pubchem ID** | **Compound** | **Class** | **Docking score** |
| --- | --- | --- | --- | --- |
| **Movement protein** | | | | |
| 1 | 9986191 | Panasenoside | Flavonoids>Flavonoids>Flavonols | -10.04 |
| 2 | 5280372 | Coniferin | Phenylpropanoids>Monolignols>Coniferyl alcohol derivatives | -9.80 |
| 3 | 5282166 | Quosp | Flavonoids>Flavonoids>Flavonols | -9.26 |
| 4 | 46173831 | Cascaroside D | Polyketides>Anthraquinones>Anthrone type | -9.14 |
| 5 | 23724697 | Cyanidin 3-(3'',6''-dimalonylglucoside) | Flavonoids>Flavonoids>Anthocyanidins and anthocyanins | -9.10 |
| 6 | 23724698 | Delphinidin 3-O-3'',6''-O-dimalonylglucoside | Flavonoids>Flavonoids>Anthocyanidins and anthocyanins | -8.97 |
| 7 | 442682 | Gallocatechin-(4alpha->8)-epigallocatechin | Flavonoids>Complex flavonoids>Proanthocyanidins | -8.88 |
| 8 | 123953 | Naadp | Alkaloids>Alkaloids derived from nicotinic acid>Pyridine alkaloids | -8.82 |
| 9 | 442678 | Epigallocatechin-(4beta->8)-epicatechin-3-O-gallate ester | Flavonoids>Complex flavonoids>Proanthocyanidins | -8.81 |
| 10 | 5281643 | Hyperoside | Flavonoids>Flavonoids>Flavonols | -8.51 |
| **Coat Protein** | | | | |
| 1 | 5282156 | Kaempferol 3-sophorotrioside | Flavonoids>Flavonoids>Flavonols | -12.13 |
| 2 | 23724703 | delphinidin 3-O-(6''-O-malonyl)-beta-D-glucoside-3'-O-beta-D-glucoside | Flavonoids>Flavonoids>Anthocyanidins and anthocyanins | -12.09 |
| 3 | 10843319 | Ternatin C5 | Flavonoids>Flavonoids>Anthocyanidins and anthocyanins | -11.84 |
| 4 | 11169452 | cyanidin 3-O-sophoroside | Flavonoids>Flavonoids>Anthocyanidins and anthocyanins | -11.47 |
| 5 | 5462439 | Helminthosporoside A | Terpenoids>Sesquiterpenoids (C15)>Others | -11.01 |
| 6 | 5281690 | Quercetin 3-(2G-xylosylrutinoside) | Flavonoids>Flavonoids>Flavonols | -10.98 |
| 7 | 443921 | Cyanidin 3-O-rutinoside 5-O-beta-D-glucoside | Flavonoids>Flavonoids>Anthocyanidins and anthocyanins | -10.96 |
| 8 | 442727 | Cascaroside A | Polyketides>Anthraquinones>Anthrone type | -10.94 |
| 9 | 23724737 | Cyanidin-3-O-(6''-O-malonyl-2''-O-glucuronyl) glucoside | Flavonoids>Flavonoids>Anthocyanidins and anthocyanins | -10.91 |
| 10 | 5282153 | Luteolin 7-diglucuronide | Flavonoids>Flavonoids>Flavonols | -10.79 |
| **Helicase domain** | | | | |
| 1 | 23724701 | Violanin | Flavonoids>Flavonoids>Anthocyanidins and anthocyanins | -13.98 |
| 2 | 5282161 | Bisdemalonylsalvianin | Flavonoids>Flavonoids>Anthocyanidins and anthocyanins | -13.93 |
| 3 | 6444318 | Albireodelphin A | Flavonoids>Flavonoids>Anthocyanidins and anthocyanins | -13.92 |
| 4 | 10843319 | Ternatin C5 | Flavonoids>Flavonoids>Anthocyanidins and anthocyanins | -13.17 |
| 5 | 123953 | Naadp | Alkaloids>Alkaloids derived from nicotinic acid>Pyridine alkaloids | -13.16 |
| 6 | 9897848 | Petunidin-3-(p-coumaroyl)-rutinoside-5-glucoside | Flavonoids>Flavonoids>Anthocyanidins and anthocyanins | -13.14 |
| 7 | 442682 | Gallocatechin-(4alpha->8)-epigallocatechin | Flavonoids>Complex flavonoids>Proanthocyanidins | -12.96 |
| 8 | 442676 | (3R,5R)-4-[3,4-dihydroxy-5-(3,4,5-trihydroxybenzoyl)oxybenzoyl]oxy-1-hydroxy-3,5-bis[(3,4,5-trihydroxybenzoyl)oxy]cyclohexane-1-carboxylic acid | Tannins and galloyl derivatives>Ellagitannins | -12.92 |
| 9 | 11953907 | Iresinin I | Amino acid related compounds>Betalains>Betacyanins | -12.91 |
| 10 | 11979365 | Gentiodelphin | Flavonoids>Flavonoids>Anthocyanidins and anthocyanins | -12.90 |
| **RdRp domain** | | | | |
| 1 | 6444318 | Albireodelphin A | Polyketides>Flavonoids>Anthocyanidins | -13.257 |
| 2 | 441932 | Medicagenic acid 3-O-triglucoside | Terpenoids>Triterpenoids | -13.234 |
| 3 | 73111 | Senna | Polyketides>Anthraquinones>Anthrone type | -12.822 |
| 4 | 442685 | Isoterchebin | phenols>polyphenol>tannin | -12.789 |
| 5 | 441892 | Protogracillin | Terpenoids>Steroids>Furostan | -12.645 |
| 6 | 23724703 | delphinidin 3-O-(6''-O-malonyl)-beta-D-glucoside-3'-O-beta-D-glucoside | Polyketides>Flavonoids>Anthocyanidins | -12.633 |
| 7 | 16131237 | Mallotusinic acid | Tannins and galloyl derivatives>Ellagitannins | -12.531 |
| 8 | 5282167 | Quercetin 3-sophorotrioside | Polyketides>Flavonoids | -12.465 |
| 9 | 5281693 | Robinin | Polyketides>Flavonoids | -12.427 |
| 10 | 11953907 | Iresinin I | Betalains>Betacyanins | -12.359 |


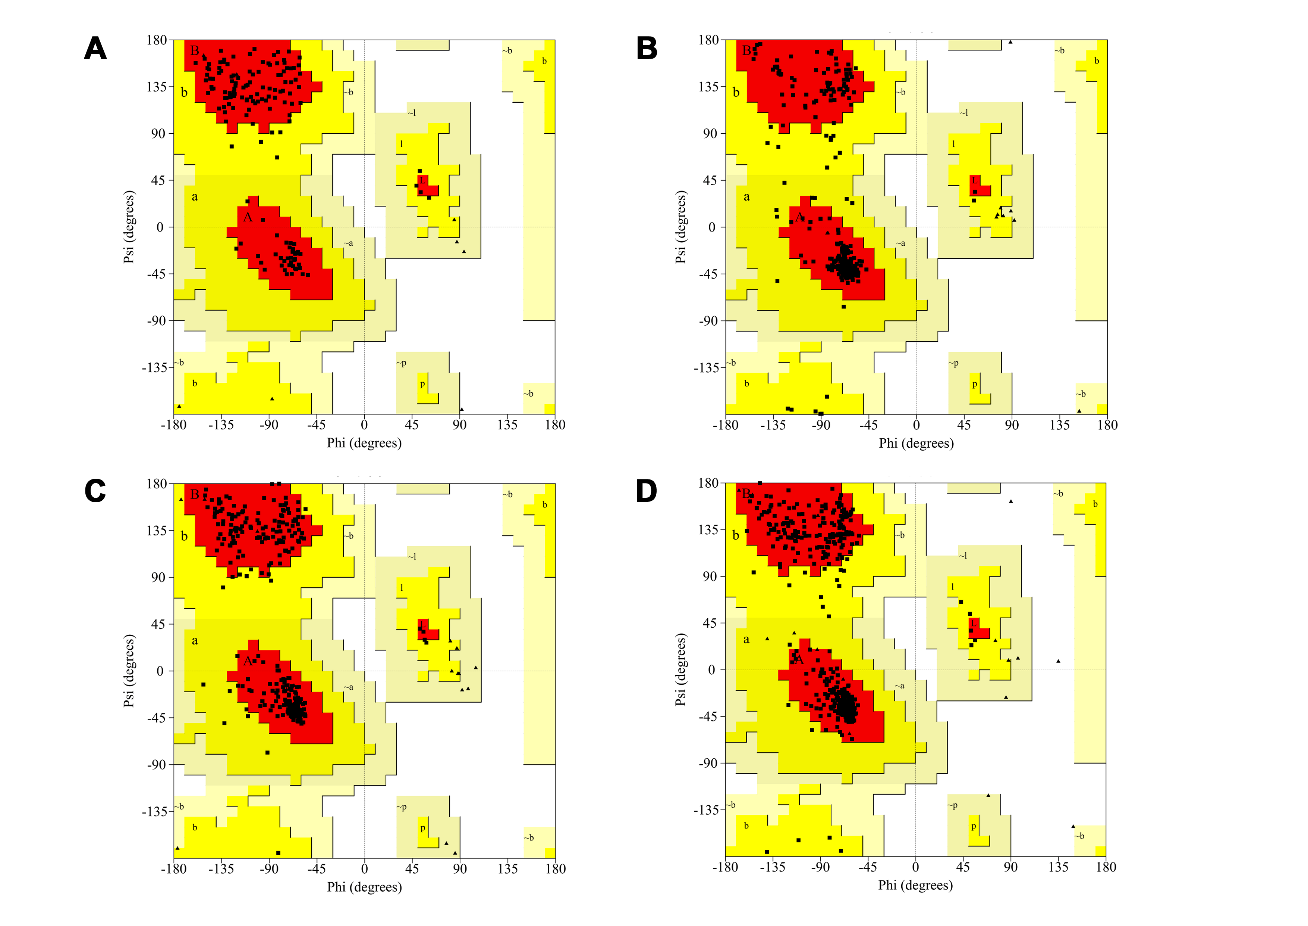


**Fig. S1.** Ramachandran plots depicting the stereochemical quality of the predicted ToBRFV protein models: A) Movement Protein (MP), (B) Coat Protein (CP), (C) Helicase domain, and (D) RNA-dependent RNA Polymerase (RdRp) domain
